# Supplementary material
Source: publisher figshare collection journal article supplement (https://karger.figshare.com/ndownloader/files/25818605)
Supplement: Supplementary file 1 [file 25818605]

**Table S1**. Commercial whole extracts (ALK-Abello) included in the skin prick test

| Pollens | Grass, mugwort, wall pellitory, cypress, olive tree, plane tree*,* pigweed, *salsola kali, cynodon dactylis,* birch |
| --- | --- |
| Plant-food allergenic sources | Almond, hazelnut, peanut, chestnut, walnut, pine nut, sunflower seed, pistachio,peach peel |
| Other allergens | *Aspergillus fumigatus, Alternaria alternata,* cat dander, dog dander*, Dermatophagoides pteronyssinus, Dermatophagoides farinae, latex, anisakis simplex,* profilin |
